# Supplementary figures and images for: Economic and Technical Considerations in Pursuing Green Building Certification: A Case Study from Iran
Source: Preprints.org preprint supplement (doi:10.20944/preprints202001.0022.v1), 2020-01-03

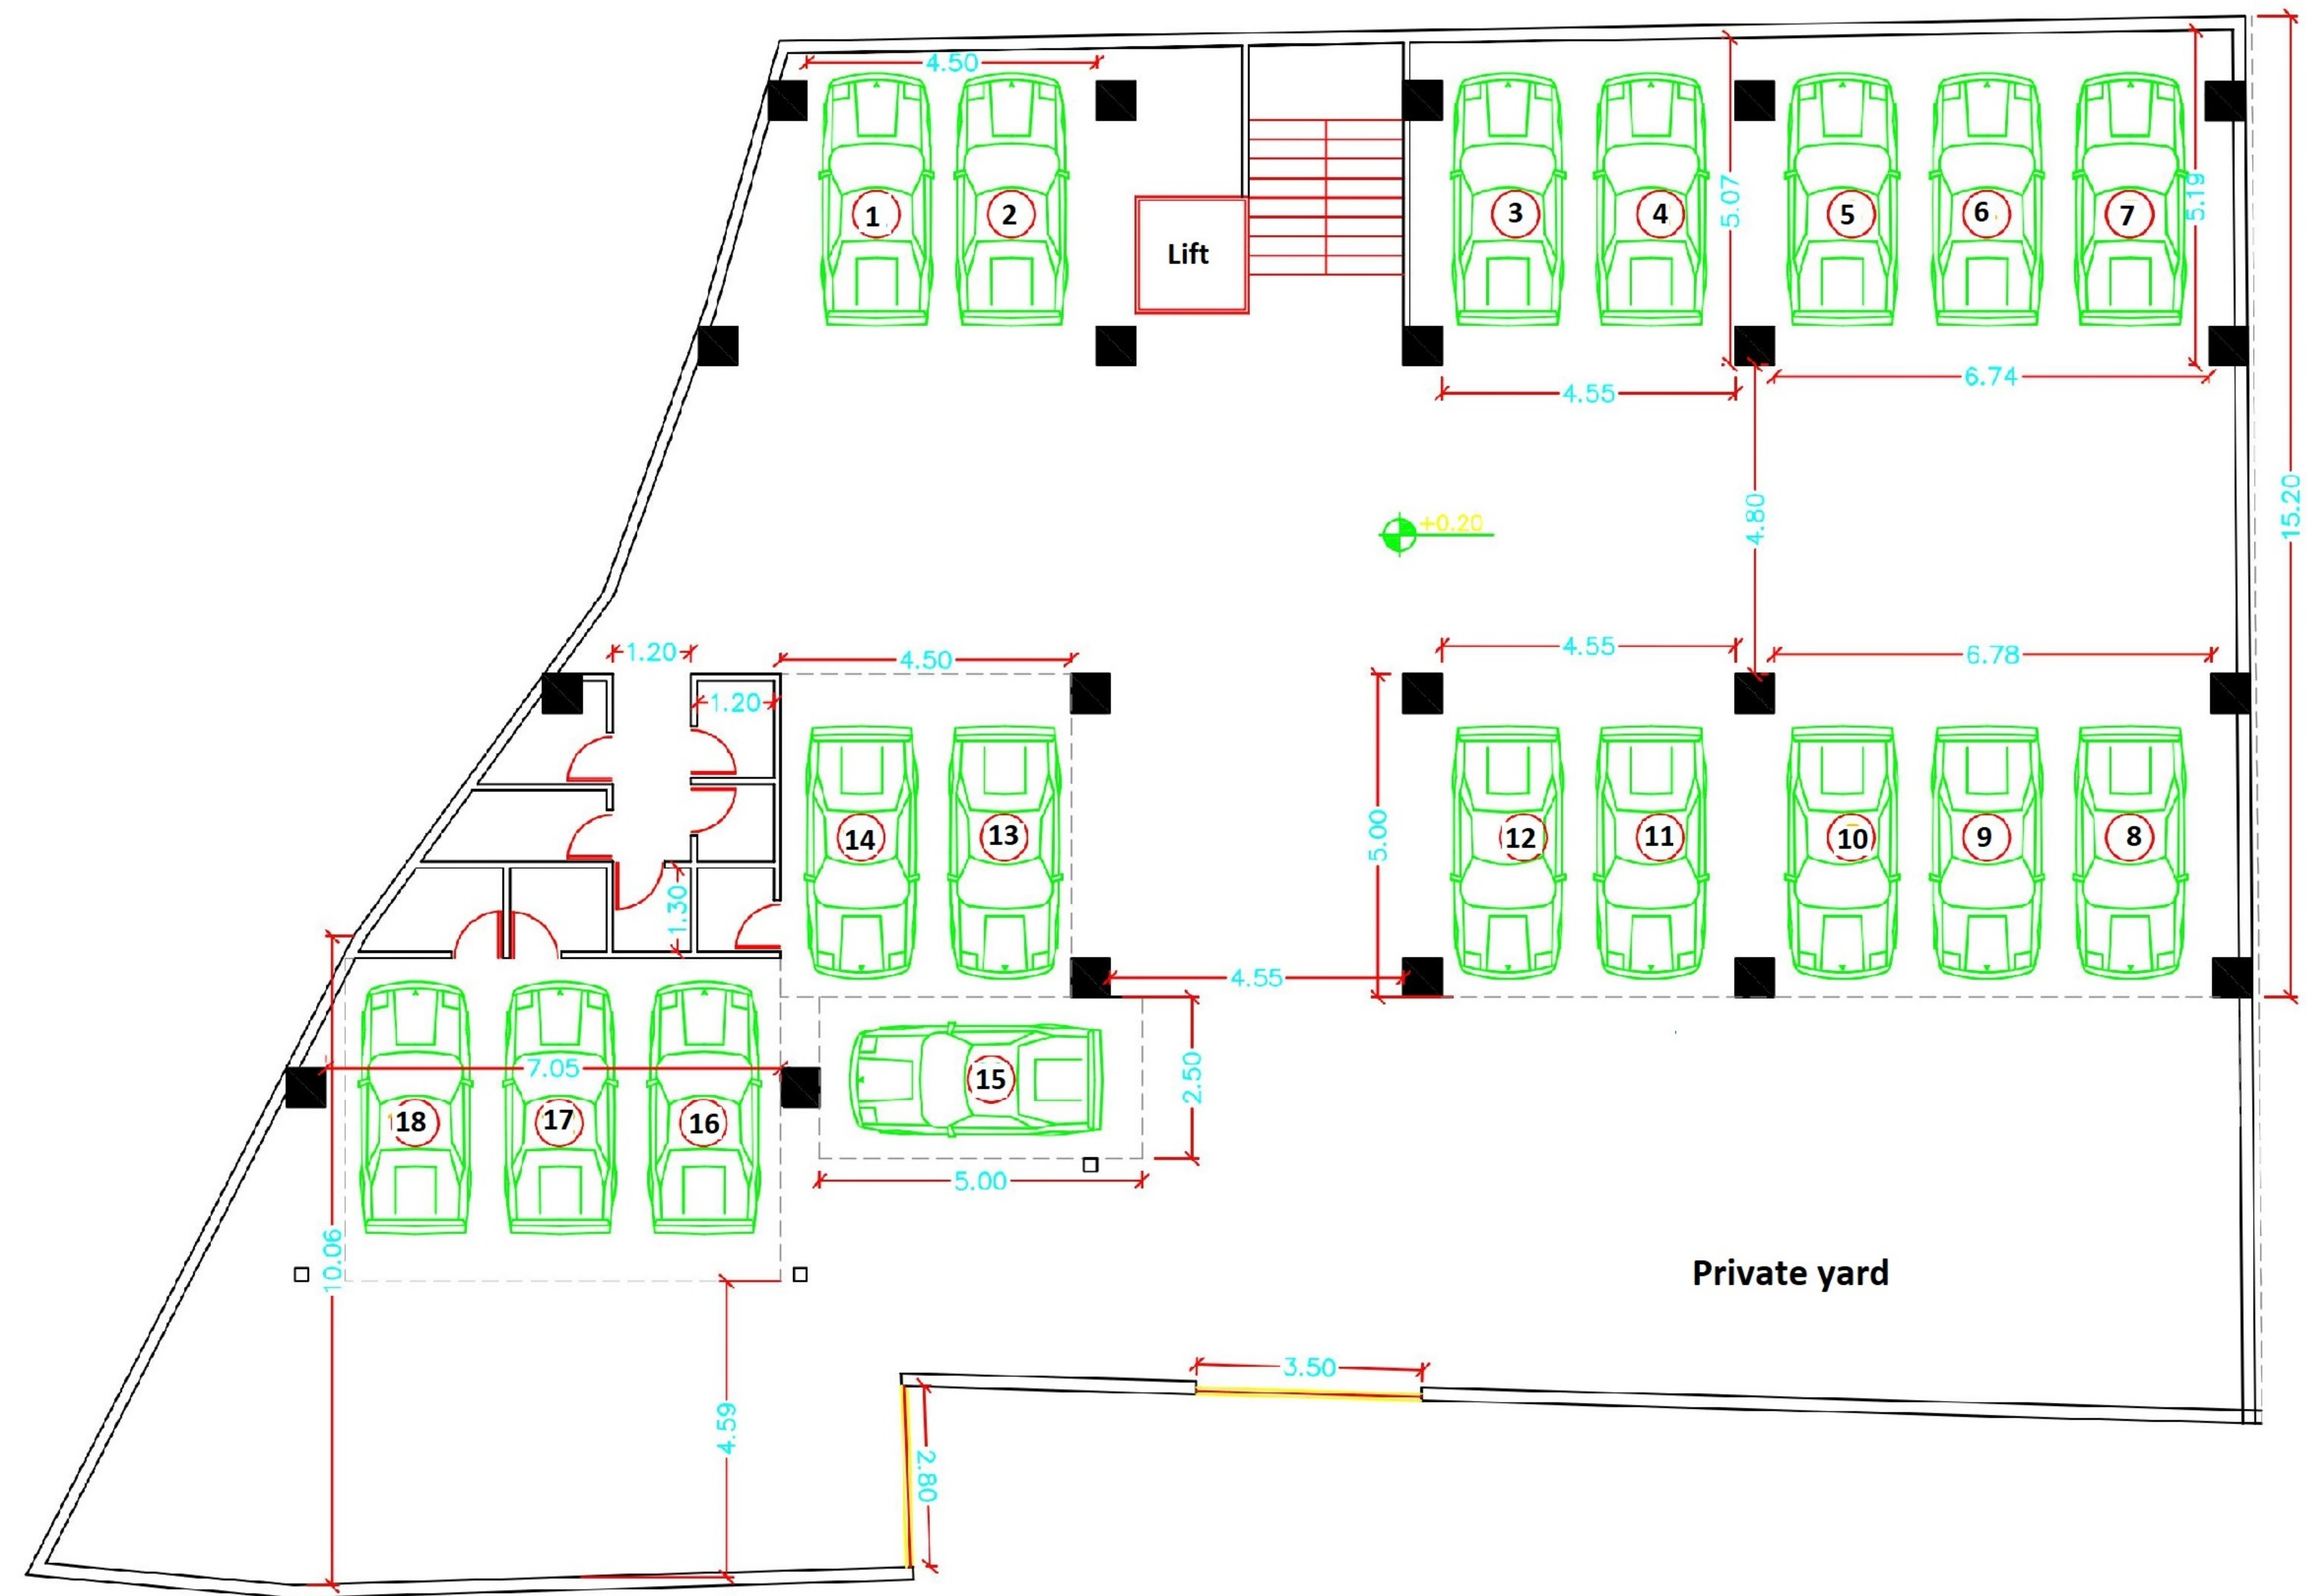



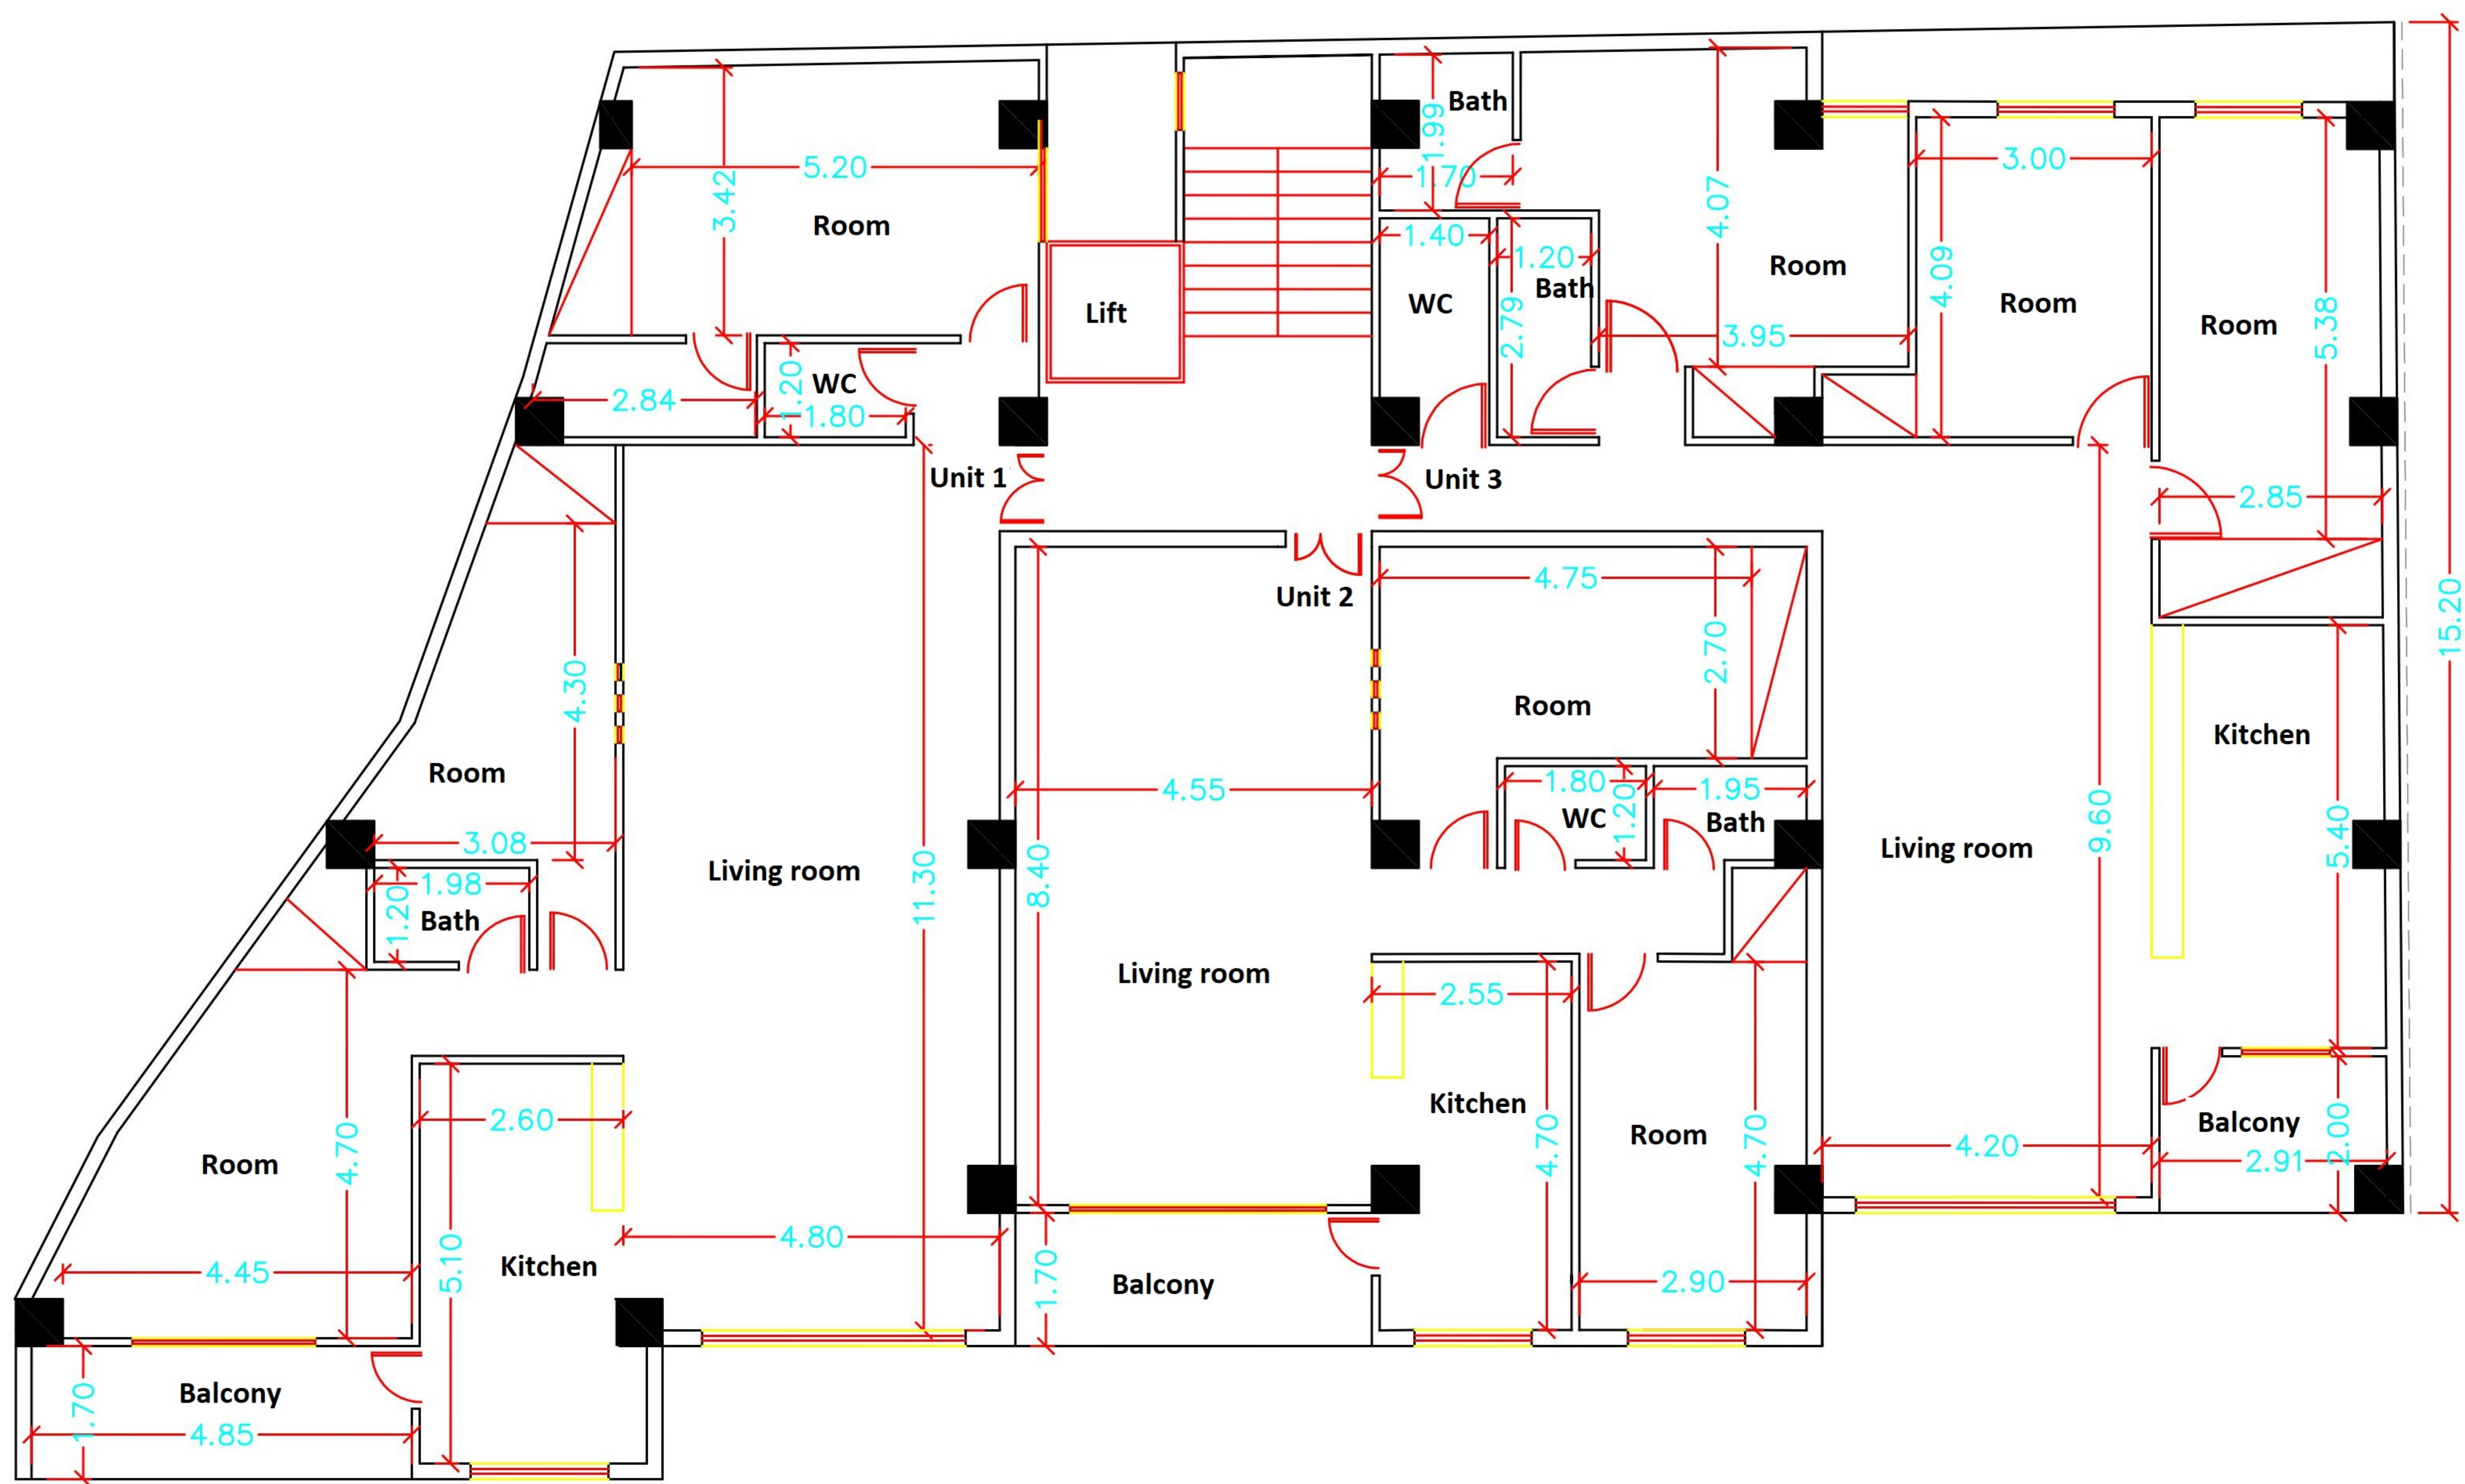

Supplement: Supplementary file 1 [file supplementary]
